# Supplementary material for: Association Between Sex and Immune Checkpoint Inhibitor Outcomes for Patients With Melanoma
Source: PubMed Central journal article supplement (PMC8640892; doi:10.1001/jamanetworkopen.2021.36823), 2021-12-02
Supplement: jamanetwopen-e2136823-s001.pdf [file jamanetwopen-e2136823-s001.pdf]

## Supplementary Online Content

Jang SR, Nikita N, Banks J, et al. Association between sex and immune checkpoint inhibitor outcomes for patients with melanoma. *JAMA Netw Open*. 2021;4(12):e2136823. doi:10.1001/jamanetworkopen.2021.36823

**eTable.** Distribution of Death Between Female and Male Advanced Melanoma Patients, by Subgroup

**eFigure 1.** Overall Survival for the Entire Patient Cohort, by Sex

**eFigure 2.** Overall Survival for Anti-PD-1 Therapy Patients Without Prior Use of Ipilimumab, by Sex

**eFigure 3.** Overall Survival for Anti-PD-1 Therapy Patients With Prior Use of Ipilimumab, by Sex

This supplementary material has been provided by the authors to give readers additional information about their work.

**eTable.** Distribution of Death Between Female and Male Advanced Melanoma Patients, by Subgroup

|                                             |            | <b>Death</b>      |                  |
|---------------------------------------------|------------|-------------------|------------------|
| <b>Subgroup</b>                             | <b>Sex</b> | <b>Yes, n (%)</b> | <b>No, n (%)</b> |
| Anti-PD1 with Ipilimumab History            | Female     | 45<br>(39.8%)     | 68<br>(60.2%)    |
|                                             | Male       | 102<br>(41.0%)    | 147<br>(59.0%)   |
| Anti-PD1 without Ipilimumab History         | Female     | 95<br>(40.6%)     | 139<br>(59.4%)   |
|                                             | Male       | 274<br>(45.1%)    | 334<br>(54.9%)   |
| Combination Therapy with Ipilimumab History | Female     | 26<br>(65.0%)     | 14<br>(35.0%)    |
|                                             | Male       | 50<br>(40.0%)     | 75<br>(60.0%)    |

**eFigure 1.** Overall Survival for the Entire Patient Cohort, by Sex

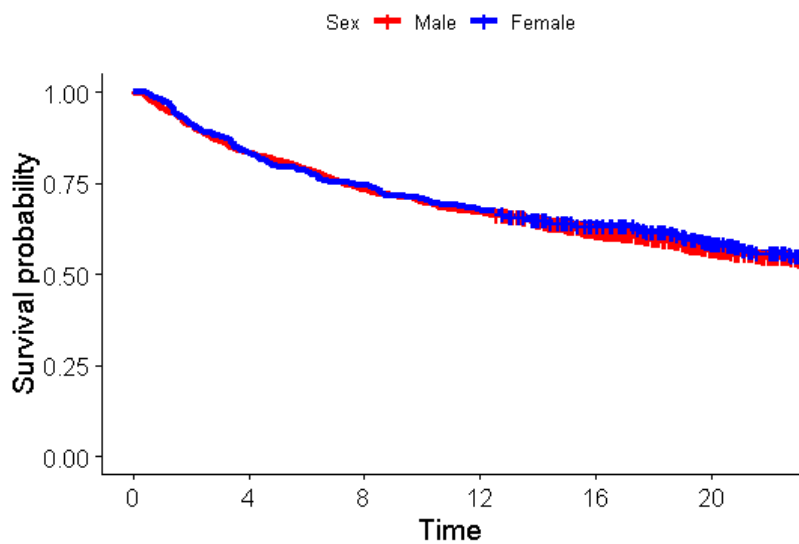

**No. at Risk**

|        |     |     |     |     |     |     |
|--------|-----|-----|-----|-----|-----|-----|
| Male   | 982 | 820 | 719 | 659 | 512 | 365 |
| Female | 387 | 323 | 288 | 263 | 222 | 160 |

The unit of measure for the x-axis (ie, time) is months, and the unit of measure for the y-axis (ie, survival probability) is percent.

**eFigure 2.** Overall Survival for Anti-PD-1 Therapy Patients Without Prior Use of Ipilimumab, by Sex

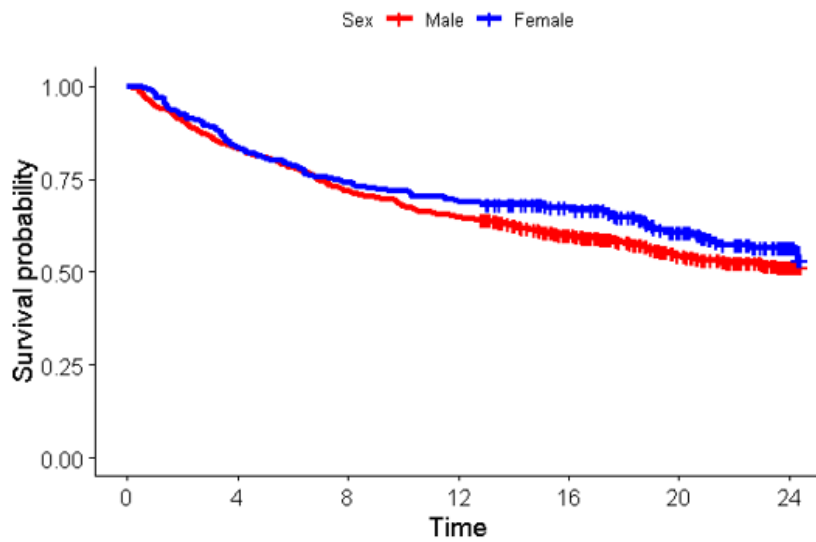

**No. at Risk**

|        |     |     |     |     |     |     |    |
|--------|-----|-----|-----|-----|-----|-----|----|
| Male   | 608 | 507 | 436 | 394 | 303 | 210 | 93 |
| Female | 234 | 195 | 173 | 162 | 138 | 97  | 38 |

The unit of measure for the x-axis (ie, time) is months, and the unit of measure for the y-axis (ie, survival probability) is percent.

**eFigure 3.** Overall Survival for Anti-PD-1 Therapy Patients With Prior Use of Ipilimumab, by Sex

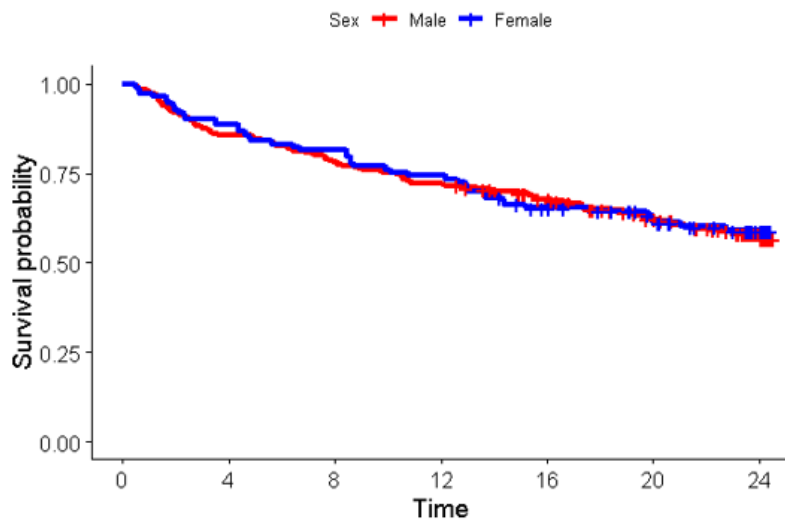

**No. at Risk**

|        |     |     |     |     |     |     |    |
|--------|-----|-----|-----|-----|-----|-----|----|
| Male   | 244 | 213 | 195 | 180 | 158 | 130 | 77 |
| Female | 113 | 100 | 92  | 84  | 70  | 58  | 36 |

The unit of measure for the x-axis (ie, time) is months, and the unit of measure for the y-axis (ie, survival probability) is percent.
